# Supplementary material for: Sequence selective dual-emission detection of (i, i + 1) bis-phosphorylated peptide using diazastilbene-type Zn(ii)-Dpa chemosensor
Source: Royal Society of Chemistry journal article supplement (doi:10.1039/b905814a), 2009-01-01
Supplement: b905814a.pdf [file b905814a.pdf]

*Electronic Supplementary Information for*

**Sequence Selective Dual-Emission Detection of (*i, i+1*) Bis-Phosphorylated Peptide  
Using Diazastilbene-Type Zn(II)-Dpa Chemosensor**

*Yoshiyuki Ishida, Masa-aki Inoue, Tomonori Inoue, Akio Ojida and Itaru Hamachi*

**Materials and Methods**

All chemical reagents were purchased from commercial suppliers (Aldrich, TCI, or Wako) and used without further purification. Fluorescence spectra were measured by a Perkin-Elmer LS55 fluorescence spectrometer. The slit width for excitation and emission were set at 15 and 10 nm, respectively. Microcalorimetric measurements were carried out using a Microcal Isothermal Titration Calorimeter VP-ITC. The titration curves obtained were analyzed using the ORIGIN software program. CD spectra were recorded with a Jasco J-720 spectropolarimeter.

**Synthesis Probe 1-2Zn(II)**

**Scheme S1** Synthesis of 1-2Zn(II).

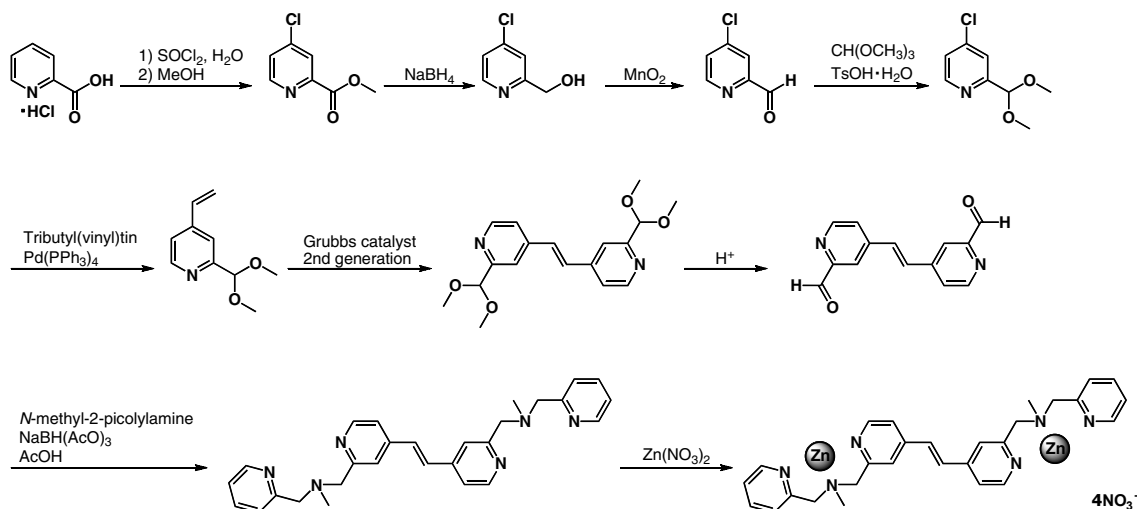

**4-Chloro-2-methoxycarbonylpyridine (7).** To a solution of 2-pyridinecarboxylic acid hydrochloride (5.0 g, 31.7 mmol) in 15 mL of thionyl chloride was added dropwise water (0.57 mL, 31.7 mmol) at 0 °C, and the reaction mixture was refluxed and stirred for 3 days. After the reaction, thionyl chloride was removed under vacuum. The resulting residue was dissolved in 30 mL of toluene, and 1 mL methanol was added dropwise to the solution at 0 °C. The precipitate was collected by filtration and then dissolved in chloroform. The solution was washed with saturated aqueous NaHCO<sub>3</sub> and dried over Na<sub>2</sub>SO<sub>4</sub>. The purification by silica gel column chromatography (hexane : EtOAc = 3 : 1) gave **7** (2.52 g, 46 %) as a colorless solid. <sup>1</sup>H NMR (δ/ppm, CDCl<sub>3</sub>, 400 MHz, TMS): 4.02 (s, 1H, OCH<sub>3</sub>), 7.49 (d, 1H, 4.8 Hz, pyridine), 8.14 (s, 1H, pyridine), 8.65 (d, 1H, *J* = 4.8 Hz, pyridine). FAB-LRMS (*m/z*) : 172 [M + H]<sup>+</sup>.

**4-Chloro-2-hydroxymethylpyridine (8).** A mixture of **7** (1.5 g, 8.74 mmol) and CaCl<sub>2</sub> (3.8 g, 35.0 mmol) and NaBH<sub>4</sub> (0.66 g, 17.5 mmol) in 10 mL of methanol and 5 mL of dry THF was stirred at 0 °C for 1h. The reaction mixture was quenched with water and extracted with EtOAc. The organic layer was dried over Na<sub>2</sub>SO<sub>4</sub>, and concentrated in vacuo to give **8** (1.23 g, 98 %) as a colorless oil. <sup>1</sup>H NMR (δ/ppm, CDCl<sub>3</sub>, 400 MHz, TMS): 4.75 (s, 2H, CH<sub>2</sub>), 7.22 (d, 1H, *J* = 5.2 Hz, pyridine), 7.31 (s, 1H, pyridine), 8.45 (d, 1H, *J* = 5.2 Hz, pyridine). FAB-LRMS (*m/z*) : 144 [M + H]<sup>+</sup>.

**4-Chloro-2-formylpyridine (9).** A suspension of **8** (1.23 g, 8.56 mmol) and MnO<sub>2</sub> (9.2 g) in 15 mL of chloroform was refluxed for 2 h. After filtration with celite pad, the filtrate was concentrated under vacuum to give **9** (1.2 g, quantitative yield.) as a yellow oil. <sup>1</sup>H NMR (δ/ppm, CDCl<sub>3</sub>, 400 MHz, TMS): 7.52 (dd, 1H, *J* = 2.0, 5.2, pyridine), 7.95 (ds, 1H, *J* = 2.0 Hz, pyridine), 8.68 (d, 1H, *J* = 5.2 Hz, pyridine), 10.2 (s, 1H, CHO). CI-MS (*m/z*) : 140 [M + H]<sup>+</sup>.

**4-Chloro-2-dimethoxymethylpyridine (3).** A mixture of **9** (0.6 g, 4.24 mmol) and trimethyl orthoformate (0.7 mL, 8.9 mmol) and *p*-toluenesulfonic acid monohydrate (32 mg, 0.17 mmol) in 15 mL of dry methanol was refluxed for 5 h. After removal of the solvent in vacuo, the residue was dissolved in EtOAc and washed 2 N NaOH aq. The organic layer was dried over Na<sub>2</sub>SO<sub>4</sub> and concentrated in vacuo to give **3** (0.57 g, 80 %) as a yellow oil. <sup>1</sup>H NMR (δ/ppm, CDCl<sub>3</sub>, 400 MHz, TMS): 3.41 (s, 6H, OCH<sub>3</sub>), 5.36 (s,

1H, CH), 7.27 (dd, 1H,  $J = 2.0, 5.2$  Hz, pyridine), 7.58 (ds, 1H,  $J = 2.0$  Hz, pyridine), 8.51 (d, 1H,  $J = 5.2$  Hz, pyridine). FAB-LRMS ( $m/z$ ): 188  $[M + H]^+$ .

**2-Dimethoxymethyl-4-vinylpyridine (4).** A mixture of **3** (0.57 g, 3.04 mmol) and tributyl(vinyl)tin (1.1 mL, 3.65 mmol) and Pd(PPh<sub>3</sub>)<sub>4</sub> (0.35 g, 0.3 mmol) in 20 mL of drytoluene was refluxed for 24 h under Ar atmosphere. After removing the precipitate by filtration with celite pad, the filtrate was concentrated in vacuo. The residue was purified by silica gel column chromatography (hexane : EtOAc = 3 : 1) to give **4** (0.45 g, 82 %) as a yellow oil. <sup>1</sup>H NMR ( $\delta$ /ppm, CDCl<sub>3</sub>, 400 MHz, TMS): 3.42 (s, 6H, OCH<sub>3</sub>), 5.37 (s, 1H, CH), 5.50 (d, 1H,  $J = 10.8$  Hz, vinyl-CH<sub>2</sub>), 6.00 (d, 1H,  $J = 17.6$  Hz, vinyl-CH<sub>2</sub>), 6.68 (dd, 1H,  $J = 10.8, 17.6$  Hz, vinyl-CH), 7.23 (d, 1H,  $J = 4.8$  Hz, pyridine), 7.53 (s, 1H, pyridine) 8.56 (d, 1H,  $J = 4.8$  Hz, pyridine). FAB-LRMS ( $m/z$ ): 188  $[M + H]^+$ .

**trans-4,4'-diaz-3,3'-Dimethoxymethylstilbene (5).** A mixture of **4** (0.31 g, 1.72 mmol) and Grubbs catalyst (2<sup>nd</sup> generation, 57 mg, 86  $\mu$ mol) in 15 mL of dry-toluene was refluxed for 24 h. After removing the precipitate by filtration with celite pad, the filtrate was concentrated in vacuo. The residue was dissolved with diisopropyl ether and insoluble was removed by filtration. The obtained solid was further washed with hexane / diisopropyl ether (1 : 1) to give **5** (0.1 g, 38 %) as a brown solid. <sup>1</sup>H NMR ( $\delta$ /ppm, CDCl<sub>3</sub>, 400 MHz, TMS): 3.44 (s, 12H, OCH<sub>3</sub>), 5.41 (s, 2H, CH), 7.28 (s, 2H, alkenyl-CH), 7.34 (d, 2H,  $J = 5.2$  Hz, pyridine), 7.68 (s, 2H, pyridine), 8.62 (d, 2H,  $J = 5.2$  Hz, pyridine). FAB-LRMS ( $m/z$ ): 331  $[M + H]^+$ .

**trans-4,4'-Diaza-3,3'-diformylstilbene (6).** A solution of **5** (50.0 mg, 0.15 mmol) in 7 mL of THF and 1 mL of conc.HCl(aq) was stirred at 50 °C for 4 h. The mixture was neutralized with saturated NaHCO<sub>3</sub>aq, and extracted with EtOAc. The organic layer was washed with brine, dried over Na<sub>2</sub>SO<sub>4</sub>, and concentrated in vacuo to give **6** (35.7 mg, quantitative yield) as a brown oil. <sup>1</sup>H NMR ( $\delta$ /ppm, CDCl<sub>3</sub>, 400 Hz, TMS): 7.39 (s, 2H, alkenyl-CH), 7.61 (d, 2H,  $J = 5.2$  Hz, pyridine), 8.11 (s, 2H, pyridine), 8.83 (d, 2H,  $J = 5.2$  Hz, pyridine), 10.1 (s, 2H, CHO). FAB-LRMS ( $m/z$ ): 239  $[M + H]^+$ .

***trans*-3,3'-Di(*N*-methyl-2-picolylaminomethyl)-4,4'-diazastilbene (1).** A mixture of **6** (35.7 mg, 0.15 mmol) and *N*-methyl-2-picolylamine hydrobromide (67.0 mg, 0.33 mmol) and NaBH(OAc)<sub>3</sub> (0.15 g, 0.6 mmol) in 15 mL of dryCH<sub>2</sub>Cl<sub>2</sub> and acetic acid (1 drop) was stirred at r.t. for 7 h. The mixture was neutralized with saturated NaHCO<sub>3</sub>aq, and extracted with chloroform. The organic layer was washed with brine and dried over Na<sub>2</sub>SO<sub>4</sub>. After removal of the solvent in vacuo, the residue was purified by silica gel column chromatography (chloroform : methanol = 20 : 1, containing NH<sub>3</sub>aq) to give compound **1** (0.45 g, 82 %) as a yellow oil. <sup>1</sup>H NMR (δ/ppm, CD<sub>3</sub>OD, 400 MHz, TMS): 2.30 (s, 6H, CH<sub>3</sub>), 3.78 (s, 8H, CH<sub>2</sub>), 7.30 (t, 2H, *J* = 4.8 Hz, pyridine), 7.51 (s, 2H, alkenyl-CH), 7.54 (dd, 2H, *J* = 2.0, 5.2 Hz, pyridine), 7.65 (d, 2H, *J* = 8.0 Hz, pyridine), 7.80-7.84 (m, 4H, pyridine), 8.46-8.49 (m, 4H, pyridine). FAB-LRMS (*m/z*) : 451 [M + H]<sup>+</sup>.

***trans*-3,3'-Di(*N*-methyl-2-picolylaminomethyl)-4,4'-diazastilbene Zn(NO<sub>3</sub>)<sub>2</sub> complex (1-2Zn(II)).** To a solution of **1** (42.9 mg, 95 μmol) in 10 mL of acetonitrile was added 306 mM of Zn(NO<sub>3</sub>)<sub>2</sub>aq (590 μL, 181 μmol). After stirring at r.t. for 2 h, the precipitate was collected and washed with acetonitrile to give the compound **1-2Zn(II)** (49.1 mg, 59 μmol, 62 %) as a colorless solid. <sup>1</sup>H NMR (δ/ppm, D<sub>2</sub>O, 400 MHz, 25 °C): 2.27 (s, 6H, CH<sub>3</sub>), 4.03-4.17 (m, 8H, CH<sub>2</sub>), 7.45-7.52 (m, 6H, alkenyl-CH and pyridine), 7.63-7.67 (m, 4H, pyridine), 7.96 (t, 2H, *J* = 7.6 Hz, pyridine), 8.51-8.53 (m, 4H, pyridine). FAB-LRMS (*m/z*) : 768 [M - NO<sub>3</sub><sup>-</sup> + H]<sup>+</sup>. Anal. calcd for C<sub>28</sub>H<sub>30</sub>N<sub>6</sub> · 2Zn(NO<sub>3</sub>)<sub>2</sub> : C, 40.55; H, 3.65; N, 16.89. Found : C, 40.71; H, 3.65; N, 17.02.

### Synthesis of the tau fragment peptides

The peptides listed in Table 1 were synthesized using the standard Fmoc-based FastMoc coupling chemistry (0.1 mmol scale) on Fmoc-Amide Resin (Novabiochem). The peptide cleavage from resin and side-chain deprotection were conducted by the treatment with TFA-*m*-cresol-thioanisole (86:2:12) over 1 h at r.t. After removal of TFA in vacuo, the crude peptide was precipitated in tert-butyl-methyl ether and purified by reversed-phase HPLC (column; YMC-pack ODS-A, 20 × 250 mm) using CH<sub>3</sub>CN (0.1%

TFA) / H<sub>2</sub>O (0.1% TFA) solvent system with a linear gradient mode. Molecular weights of the peptides were confirmed by MALDI-TOF mass analysis as shown in Table S1.

**Table S1** | MALDI-TOF mass analysis of synthetic tau fragment peptides

| peptide               | sequence                              | <i>m/z</i> , calcd. [M-H] <sup>-</sup> | <i>m/z</i> , found |
|-----------------------|---------------------------------------|----------------------------------------|--------------------|
| tau(400-409)-2P (i+1) | YSGD <b>pTp</b> SPRHLS                | 1376.51                                | 1376.81            |
| tau(204-217)-2P (i+2) | YGTPGSRSR <b>pTp</b> SLPT             | 1733.75                                | 1733.74            |
| tau(231-238)-2P (i+2) | YTPPK <b>pSp</b> SS                   | 1121.42                                | 1111.81            |
| tau(210-220)-2P (i+3) | YSRT <b>pSp</b> TPPT                  | 1473.63                                | 1473.41            |
| tau(204-217)-2P (i+4) | YGTPG <b>pSp</b> SRSR <b>pTp</b> SLPT | 1733.75                                | 1733.37            |
| tau(204-217)-2P (i+6) | YGTPG <b>pSp</b> SRT <b>pSp</b> SLPT  | 1733.75                                | 1733.90            |
| tau(400-409)-1P       | YSGDT <b>pSp</b> SRHLS                | 1296.55                                | 1297.73            |

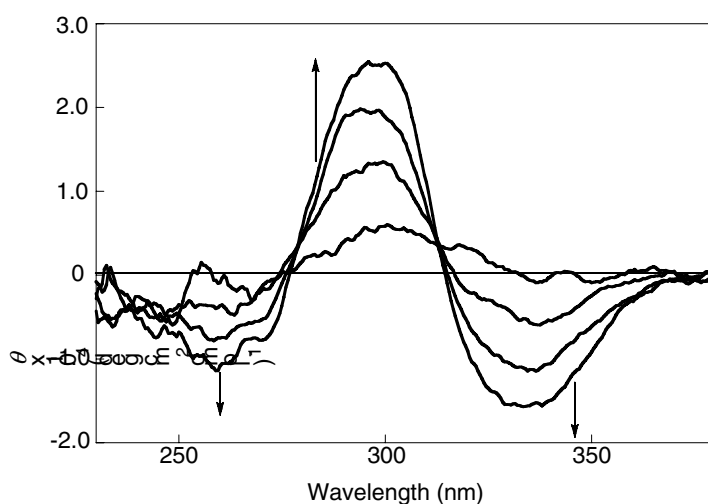

**Fig. S1** CD spectral changes of 1-2Zn(II) (20 μM) upon addition of Tau(400-409)-2P(i+1) in 50 mM HEPES buffer at pH 7.2 and 25 °C.
